# Supplementary material for: A Cluster Randomized Study of The Safety of Integrated Treatment of Trachoma and Lymphatic Filariasis in Children and Adults in Sikasso, Mali
Source: PLOS journal article supplement (doi:10.1371/journal.pntd.0002221), 2013-05-09
Supplement: S5 (10.1371/journal.pntd.0002221.s005) [file journal.pntd.0002221.s005]

REF.No. 109 /AZIVAL

Bamako, le 29 septembre 2009

A  
Monsieur le Président  
du Comité d'Ethique  
de la FMPOS, Bamako, Mali.

**Objet : Soumission de modifications de protocole au Comité d'Ethique de la FMPOS du Mali.**

Monsieur le Président,

J'ai l'honneur de vous soumettre les amendements apportés au protocole d'étude ci-joint intitulé : « **Etude de pharmacovigilance sur l'innocuité du traitement intégré du trachome et de la filariose lymphatique chez les enfants et les adultes vivant dans la région de Sikasso au Mali** » Version 2.0 du 08/08/09.

Ces amendements concernent la mise à jour des données sur la cartographie du trachome et de la filariose lymphatique de juin 2008 dans la région de Sikasso et ont porté sur les points suivants:

1. Le deuxième paragraphe de la section 1.2.1 de l'introduction en page 7 du protocole.
2. Le dernier point de la page 8 incluant les tableaux 2 et 3 du protocole.

Je vous prie, Monsieur le Président, de croire à l'expression de mes sentiments respectueux.

Samba O. SOW, MD, MSc.

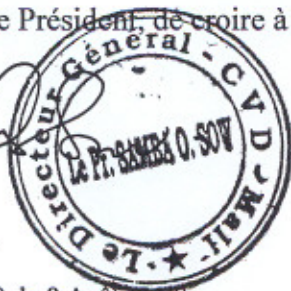

PJ : 4 copies du protocole (version 2.0 du 8 Août 2009).

**MINISTERE DE L'ENSEIGNEMENT  
SUPERIEUR ET DE LA RECHERCHE SCIENTIFIQUE**

**>> UNIVERSITE DE BAMAKO >>>**

**FACULTE DE MEDECINE DE PHARMACIE ET  
D'ODONTO-STOMATOLOGIE / BP 1805**

☎ : (223) 20 22 52 77

☎ : (223) 20 22 96 58

*BAMAKO - MALI*

N°09 67 /FMPOS

Le Président du Comité  
D'Éthique de la FMPOS

Bamako, le 05 Octobre 2009

*(-)/u* **Professeur Samba Ousmane SOW**  
**MD ; MSc. CVD Mali**

Cher Professeur,

J'ai le plaisir de vous informer que votre projet de recherche intitulé : «**Etude de pharmacovigilance sur l'innocuité du traitement intégré du trachome et de la filariose lymphatique chez les enfants et les adultes vivant dans la région de Sikasso au Mali**» a été examiné par le Comité d'Éthique de la Faculté de Médecine, de Pharmacie et d'Odonto-Stomatologie de l'Université de Bamako en comité restreint.

Les nouveaux amendements indiqués dans votre lettre du 29/10/09 à la version 2.0 ont été approuvés car ils ne modifient en rien la qualité des résultats.

Le Comité Institutionnel d'Éthique de la FMPOS vous souhaite plein succès.

**LE PRESIDENT**  
**DU COMITE D'ETHIQUE**

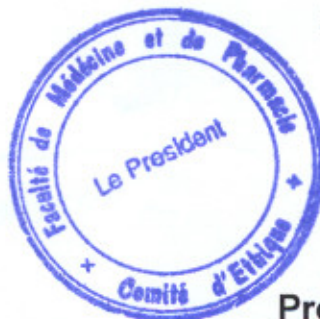

**Prof. Mamadou Marouf KEITA**
